# Supplementary material for: Benzene-centered tripodal diglycolamides: synthesis, metal ion extraction, luminescence spectroscopy, and DFT studies
Source: Royal Society of Chemistry journal article supplement (doi:10.1039/c6dt04034a), 2016-12-19
Supplement: c6dt04034a4.pdf [file c6dt04034a4.pdf]

## **Benzene-centered tripodal diglycolamides: Synthesis, metal ion extraction, luminescence spectroscopy, and DFT studies**

Andrea Leoncini,<sup>a</sup> Seraj Ahmed Ansari,<sup>b</sup> Prasanta Kumar Mohapatra,<sup>b,\*</sup> Sheikh Musharaf Ali,<sup>c</sup> Arijit Sengupta,<sup>b</sup> Jurriaan Huskens<sup>a</sup> and Willem Verboom<sup>a,\*</sup>

### **Electronic Supporting Information**

## Solvent extraction studies

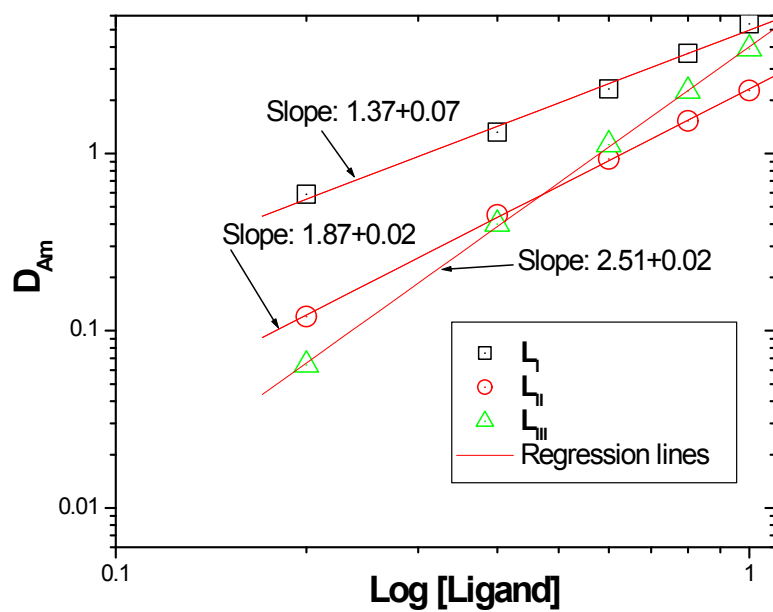

**Fig. S1** Extraction of Am(III) with varying concentrations of the Bz-T-DGA ligands  $L_I$ ,  $L_{II}$ , and  $L_{III}$  from 1.0 M  $\text{HNO}_3$ .

**Table S1** Distribution measurements (*D*-values) by Bz-T-DGA ligands **L<sub>I</sub>**, **L<sub>II</sub>**, and **L<sub>III</sub>** ([ligand]: 1 mmol/L in 95% *n*-dodecane + 5% *iso*-decanol).

| [HNO <sub>3</sub> ] (M) | <b>L<sub>I</sub>-Eu</b> | <b>L<sub>I</sub>-Am</b> | <b>L<sub>II</sub>-Eu</b> | <b>L<sub>II</sub>-Am</b> | <b>L<sub>III</sub>-Eu</b> | <b>L<sub>III</sub>-Am</b> |
|-------------------------|-------------------------|-------------------------|--------------------------|--------------------------|---------------------------|---------------------------|
| 0.1                     | 2.62 ± 0.13             | 0.10 ± 0.02             | 1.24 ± 0.05              | 0.10 ± 0.02              | 0.12 ± 0.01*              | 0.007 ± 0.001*            |
| 0.2                     | 5.14 ± 0.22             | 0.22 ± 0.01             | 1.62 ± 0.14              | 0.15 ± 0.01              | 0.11 ± 0.05               | 0.009 ± 0.001             |
| 0.5                     | 16.2 ± 1.51             | 1.14 ± 0.06             | 3.74 ± 0.24              | 0.37 ± 0.02              | 0.15 ± 0.02               | 0.014 ± 0.01              |
| 1                       | 49.4 ± 2.81             | 5.22 ± 0.08             | 10.3 ± 1.3               | 1.32 ± 0.05              | 0.34 ± 0.01               | 0.034 ± 0.01              |
| 3                       | 396 ± 35                | 235 ± 19.4              | 110 ± 5.5                | 14.3 ± 0.26              | 32.7 ± 1.65               | 4.06 ± 0.11               |
| 6                       | 670 ± 150               | 460 ± 110               | 335 ± 65                 | 43.0 ± 1.6               | 395 ± 55                  | 61.9 ± 2.54               |

\*repeat data

**Table S2** Separation factor (SF) data obtained by Bz-T-DGA ligands **L<sub>I</sub>**, **L<sub>II</sub>**, and **L<sub>III</sub>** ([ligand]: 1 mmol/L in 95% *n*-dodecane + 5% *iso*-decanol).

| [HNO <sub>3</sub> ] (M) | SF (Eu/Am)           |                       |                        |
|-------------------------|----------------------|-----------------------|------------------------|
|                         | <b>L<sub>I</sub></b> | <b>L<sub>II</sub></b> | <b>L<sub>III</sub></b> |
| 0.1                     | 26.2                 | 12.4                  | 16.7                   |
| 0.2                     | 23.4                 | 10.8                  | 11.7                   |
| 0.5                     | 14.2                 | 10.1                  | 10.5                   |
| 1                       | 9.5                  | 7.8                   | 10.0                   |
| 3                       | 1.7                  | 7.7                   | 8.1                    |
| 6                       | 1.5                  | 7.8                   | 6.4                    |

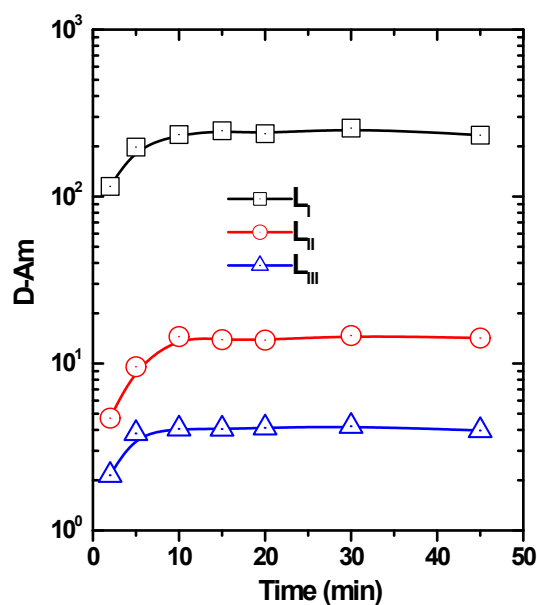

**Fig. S2** Kinetics of Am<sup>3+</sup> ion extraction from 3 M HNO<sub>3</sub>; [Ligand]: 1.0 × 10<sup>-3</sup> M, 95% *n*-dodecane + 5% *iso*-decanol.

### Luminescence spectroscopic studies

$$I(t) = A_0 + A_1 \exp(-t/\tau_1) + A_2 \exp(-t_2/\tau_2) + \dots$$

$$I_{\text{LI}}(t) = (8095 \pm 104) \exp(-t/1.33) \text{ with } \chi^2 = 0.9986$$

$$I_{\text{LII}}(t) = (4543 \pm 116) \exp(-t/1.21) \text{ with } \chi^2 = 0.9976$$

$$I_{\text{LIII}}(t) = (3500 \pm 117) \exp(-t/0.607) \text{ with } \chi^2 = 0.9979$$

**Table S3** Photophysical properties of the extracted  $\text{Eu}^{3+}$  complexes

| Photophysical constants                                   | <b>L<sub>III</sub></b> | <b>L<sub>II</sub></b> | <b>L<sub>I</sub></b> |
|-----------------------------------------------------------|------------------------|-----------------------|----------------------|
| lifetime (ms)                                             | 0.607                  | 1.21                  | 1.33                 |
| Number of species                                         | 1                      | 1                     | 1                    |
| Number of water molecules                                 | 1                      | 0                     | 0                    |
| Asymmetry factor                                          | 3.90                   | 1.805                 | 2.179                |
| $\Omega_2$ ( $10^{-20}$ )                                 | 6.37                   | 2.94                  | 4.44                 |
| $\Omega_4$ ( $10^{-20}$ )                                 | 3.09                   | 1.83                  | 5.23                 |
| $\tau_r$ (ms)                                             | 3.76                   | 6.18                  | 4.34                 |
| $\tau_{nr}$ (ms)                                          | 0.73                   | 1.96                  | 1.92                 |
| Quantum efficiency ( $\eta$ )                             | 0.16                   | 0.19                  | 0.31                 |
| $A_{\text{md}}$ (magnetic dipole transition probability)  | 42.9                   | 43.2                  | 42.8                 |
| $A_{2\text{ed}}$ (electric dipole transition probability) | 168                    | 78.1                  | 117                  |
| $A_{4\text{ed}}$ (electric dipole transition probability) | 39.7                   | 23.6                  | 67                   |
| $\beta_1$ (branching ratio)                               | 0.16                   | 0.26                  | 0.19                 |
| $\beta_2$ (branching ratio)                               | 0.63                   | 0.48                  | 0.51                 |
| $\beta_4$ (branching ratio)                               | 0.15                   | 0.15                  | 0.29                 |

## Computational methods

**Table S4** Quantum chemical descriptors of **L<sub>I</sub>**, **L<sub>II</sub>**, and **L<sub>III</sub>** at the B3LYP/TZVP level of theory

| S.No          | Complex                | $E_{\text{HOMO}}$<br>(eV) | $E_{\text{LUMO}}$<br>(eV) | $\Delta E$<br>(eV) | $\chi$<br>(eV) | $\eta$<br>(eV) | $\Delta N$ |
|---------------|------------------------|---------------------------|---------------------------|--------------------|----------------|----------------|------------|
| Gas Phase     |                        |                           |                           |                    |                |                |            |
| 1             | <b>L<sub>I</sub></b>   | -6.118                    | -0.374                    | 5.744              | 3.246          | 2.872          | 2.806      |
| 2             | <b>L<sub>II</sub></b>  | -6.495                    | -2.028                    | 4.467              | 4.261          | 2.233          | 3.111      |
| 3             | <b>L<sub>III</sub></b> | -6.042                    | -0.241                    | 5.801              | 3.141          | 2.900          | 2.801      |
| Solvent Phase |                        |                           |                           |                    |                |                |            |
| 1             | <b>L<sub>I</sub></b>   | -6.108                    | -0.352                    | 5.756              | 3.23           | 2.878          | 0.609      |
| 2             | <b>L<sub>II</sub></b>  | -6.536                    | -1.943                    | 4.593              | 4.239          | 2.296          | 0.574      |
| 3             | <b>L<sub>III</sub></b> | -6.095                    | -0.26                     | 5.835              | 3.177          | 2.917          | 0.610      |

**Table S5** Orbital occupations of ‘Am’ with **L<sub>I</sub>**, **L<sub>II</sub>**, and **L<sub>III</sub>** at the B3LYP/TZVP level of theory

| S.No | Complexation                | s    | p     | d     | f    |
|------|-----------------------------|------|-------|-------|------|
| 1    | $(AmL_I(NO_3)_3)_g$         | 4.15 | 11.98 | 10.70 | 6.15 |
| 2    | $(Am(L_{II})_2(NO_3)_3)_g$  | 4.15 | 11.98 | 10.73 | 6.14 |
| 3    | $(Am(L_{III})_2(NO_3)_3)_g$ | 4.15 | 11.98 | 10.70 | 6.16 |
